# Supplementary material for: Population-Based Incidence Rates of First-Ever Stroke in Central Vietnam
Source: PubMed Central journal article supplement (PMC4981455; doi:10.1371/journal.pone.0160665), 2016-08-11
Supplement: pone.0160665.s002.pdf [file pone.0160665.s002.pdf]

| Age group, years       | Ischemic stroke | Intracerebral hemorrhage | Subarachnoid hemorrhage | Undetermined stroke | Total        |
|------------------------|-----------------|--------------------------|-------------------------|---------------------|--------------|
| <b>Male</b>            |                 |                          |                         |                     |              |
| <15                    | 0.1             | 0.7                      | 0.0                     | 0.0                 | 0.9          |
| 15-24                  | 0.2             | 0.8                      | 0.2                     | 0.0                 | 1.3          |
| 25-34                  | 0.1             | 0.9                      | 0.0                     | 0.0                 | 1.1          |
| 35-44                  | 5.2             | 11.3                     | 0.8                     | 1.1                 | 18.4         |
| 45-54                  | 18.7            | 16.0                     | 1.6                     | 5.0                 | 41.3         |
| 55-64                  | 21.3            | 15.3                     | 1.6                     | 5.0                 | 43.2         |
| 65-74                  | 23.8            | 12.2                     | 0.9                     | 5.1                 | 42.1         |
| 75-84                  | 23.5            | 10.4                     | 0.8                     | 5.2                 | 40.0         |
| ≥85                    | 6.2             | 2.2                      | 0.3                     | 1.8                 | 10.5         |
| <b>Total</b>           | <b>99.2</b>     | <b>69.8</b>              | <b>6.4</b>              | <b>23.4</b>         | <b>198.7</b> |
| <b>Female</b>          |                 |                          |                         |                     |              |
| <15                    | 0.2             | 0.0                      | 0.0                     | 0.0                 | 0.2          |
| 15-24                  | 0.4             | 1.4                      | 0.0                     | 0.1                 | 1.9          |
| 25-34                  | 1.0             | 1.3                      | 0.0                     | 0.3                 | 2.7          |
| 35-44                  | 3.5             | 3.5                      | 0.2                     | 1.0                 | 8.1          |
| 45-54                  | 7.5             | 7.1                      | 0.5                     | 2.0                 | 17.1         |
| 55-64                  | 16.1            | 9.7                      | 0.8                     | 4.1                 | 30.7         |
| 65-74                  | 22.4            | 9.8                      | 0.8                     | 5.2                 | 38.3         |
| 75-84                  | 26.8            | 10.3                     | 1.2                     | 6.7                 | 44.9         |
| ≥85                    | 6.0             | 3.7                      | 0.3                     | 1.7                 | 11.7         |
| <b>Total</b>           | <b>84.0</b>     | <b>47.0</b>              | <b>3.9</b>              | <b>20.9</b>         | <b>155.7</b> |
| <b>Male and Female</b> |                 |                          |                         |                     |              |
| <15                    | 0.3             | 0.7                      | 0.0                     | 0.1                 | 1.1          |
| 15-24                  | 0.7             | 2.2                      | 0.3                     | 0.1                 | 3.2          |
| 25-34                  | 1.2             | 2.2                      | 0.1                     | 0.3                 | 3.8          |
| 35-44                  | 8.6             | 14.8                     | 1.0                     | 2.0                 | 26.5         |
| 45-54                  | 26.2            | 23.2                     | 2.1                     | 6.9                 | 58.4         |
| 55-64                  | 37.4            | 25.1                     | 2.3                     | 9.1                 | 73.9         |
| 65-74                  | 46.3            | 22.0                     | 1.7                     | 10.4                | 80.4         |
| 75-84                  | 50.3            | 20.7                     | 2.0                     | 11.9                | 84.9         |
| ≥85                    | 12.2            | 6.0                      | 0.6                     | 3.5                 | 22.3         |
| <b>Total</b>           | <b>183.1</b>    | <b>116.8</b>             | <b>10.2</b>             | <b>44.3</b>         | <b>354.5</b> |
